# Supplementary material
Source: PubMed Central journal article supplement (PMC5031099)
Supplement: Supp_Fig2.pdf [file Supp_Fig2.pdf]

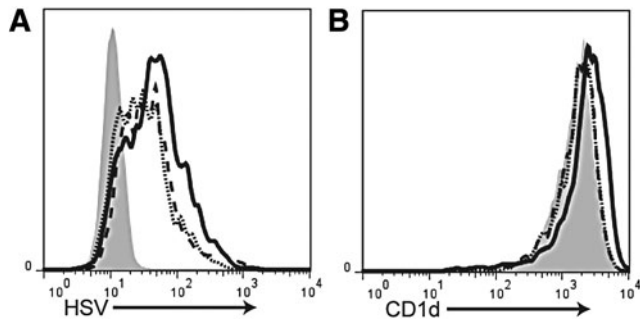

**SUPPLEMENTARY FIG. S2.** Levels of HSV-1 and CD1d in HeLa.CD1d cells postinfection. **(A)** HeLa.CD1d cells were mock treated (*gray-filled histogram*) or infected with wild-type HSV-1 (*solid line*),  $\Delta U_{L49}$  (*dotted line*) or  $U_{L49R}$  (*dashed line*) at an MOI of 10 for 4 h. The cells were fixed, permeabilized with 0.1% saponin, stained with an anti-HSV antibody, and analyzed by flow cytometry. **(B)** Aliquots of the same mock-treated or virus-infected cells were also stained with the CD1d-specific mAb 42.1 and analyzed by flow cytometry. HSV, herpes simplex virus; MOI, multiplicities of infection.
